# Supplementary material
Source: publisher figshare collection journal article supplement (https://tandf.figshare.com/articles/dataset/_/5197981)
Supplement: Supplementary file 1 [file 8868778]

## SUPPLEMENTARY MATERIAL

### Phytochemical analysis of *Saponaria officinalis* L. shoots and flowers essential oils

Goran M. Petrović<sup>a\*</sup>, Marija S. Ilić<sup>a</sup>, Vesna P. Stankov-Jovanović<sup>a</sup>, Gordana S. Stojanović<sup>a</sup> and Snežana Č. Jovanović<sup>a</sup>

<sup>a</sup>*Department of Chemistry, Faculty of Science and Mathematics, University of Niš, Višegradska 33, 18000 Niš, Serbia*

**Abstract:** Phytochemical analysis by GC and GC/MS of the essential oil samples obtained from fresh shoots and flowers of *Saponaria officinalis* L. allowed the identification of 96 components in total, comprising 94.7% and 86.0% of the total oils compositions, respectively. Regarding the shoots essential oil, the major of 87 identified volatile compounds were phytol (14.1%), tricosane-6,8-dione (13.4%), patchouli alcohol (7.9%) and tricosane (7.2%), whereas patchouli alcohol (20.0%), heneicosane (11.5%) and tricosane (8.4%) were dominant among the 66 volatiles in the flower oil. Nonterpenoid compounds had the highest contribution in *Saponaria officinalis* shoots essential oil (53.7%) while in the flower oil, constituents were almost evenly distributed between the oxygenated sesquiterpenoid (41.2%) and nonterpenoid compounds (39.5%).

**Keywords:** *Saponaria officinalis* L., essential oil, chemical composition, GC/MS.

## Experimental

### *Plant material and essential oil preparation*

Aerial parts of wild *S. officinalis* population, about 46 individuals, were collected in the vicinity of the urban area of the city of Niš, South Serbia, during Jun 2016. The plant was identified by us and a voucher specimen was deposited in the Herbarium Moesiacum Niš (HMN), Department of Biology and Ecology, Faculty of Science and Mathematics, University of Niš, under the acquisition number 13104. The ground plant

---

\* Corresponding author: Goran Petrovic. E-mail peca@pmf.ni.ac.rs, Tel. +381628049194

material of the fresh shoots (585 g) and flowers (95 g) were hydrodistilled for 3 h, using a Clevenger-type apparatus according to the method recommended in British Pharmacopoeia (1988). The oils were obtained in a yield of 0.006% and 0.009% (w/w) for shoots and flowers essential oils, respectively, trapped in *n*-hexane and dried over anhydrous sodium sulfate. Samples were stored at 4 °C in the dark until analyzed.

### ***GC and GC/MS analysis***

GC/MS analyses were performed on an Agilent 7890 gas chromatograph with 7000B GC/MS/MS triple quadrupole system, operating in MS1 scan mode, and equipped with a fused-silica capillary column Agilent HP-5 MS (30 m × 0.25 mm i.d. × 0.25 µm film thickness). The chromatographic analyses were carried out in the following conditions: He as carrier gas at a flow rate of 1.0 mL/min, GC oven temperature was kept at 70 °C for 2.25 min and programmed to 300 °C at a rate of 5 °C/min and hold for 10 min at that temperature, split ratio was adjusted at 10:1, injection volume 1 µL. Post run: back flash for 1.89 min, at 280 °C, with helium pressure of 50 psi. The injector temperature was set at 300 °C. Ionization mode was electronic impact at 70 eV. Mass range was set from 40 to 560 Da.

For GC/FID analyses, the same column and chromatographic conditions were applied as described for GC/MS. FID detector temperature was 300 °C. The percentage amounts of the separated compounds were calculated from the GC peak areas using the normalization method without correction factors.

The data are reported as mean value of three sample injections.

### ***Identification of volatile compounds***

Components were identified by comparison of their mass spectra with those of Wiley 6, Adams 2007, NIST 11 and Essentialoils libraries, applied on Agilent Mass Hunter Workstation (B.06.00) and AMDIS (2.1, DTRA/NIST, 2011) software and confirmed by comparing of their relative retention indexes (relative to C8-C32 *n*-alkanes) with authentic standards and components of known oils or values from the literature.

Table S1. Chemical compositions of the *Saponaria officinalis* shoots and flowers essential oils obtained by GC and GC/MS

| No | RI   | RA   | Compound                           | Content % |         | Class |
|----|------|------|------------------------------------|-----------|---------|-------|
|    |      |      |                                    | Shoots    | Flowers |       |
| 1  | 956  | 952  | Benzaldehyde                       | /         | tr      | O     |
| 2  | 959  | 959  | 1-Heptanol                         | 0.1       | /       | O     |
| 3  | 1042 | 1036 | Benzene acetaldehyde               | 0.1       | 0.3     | O     |
| 4  | 1064 | 1063 | 1-Octanol                          | 0.1       | tr      | O     |
| 5  | 1097 | 1095 | Linalool                           | 0.1       | /       | MO    |
| 6  | 1167 | 1165 | 1-Nonanol                          | tr        | 0.2     | O     |
| 7  | 1191 | 1186 | $\alpha$ -Terpineol                | tr        | tr      | MO    |
| 8  | 1198 | 1195 | Estragole                          | tr        | /       | O     |
| 9  | 1203 | 1201 | Decanal                            | tr        | tr      | O     |
| 10 | 1222 | 1217 | $\beta$ -Cyclocitral               | 0.1       | /       | MO    |
| 11 | 1252 | 1249 | Geraniol                           | tr        | 0.1     | MO    |
| 12 | 1261 | 1260 | ( <i>E</i> )-2-Decenal             | 0.1       | 0.1     | O     |
| 13 | 1300 | 1294 | 1-nitro-2-Phenylethane             | /         | 0.1     | O     |
| 14 | 1315 | 1315 | ( <i>E,E</i> )-2,4-Decadienal      | 0.1       | /       | O     |
| 15 | 1322 | 1319 | ( <i>Z</i> )-3-Hexenyl tiglate     | 0.2       | /       | O     |
| 16 | 1386 | 1383 | ( <i>E</i> )- $\beta$ -Damasconone | 0.1       | /       | MO    |
| 17 | 1389 | 1386 | ( <i>Z</i> )- $\beta$ -Damascone   | 0.3       | tr      | MO    |
| 18 | 1392 | 1390 | ( <i>E</i> )-Jasmone               | tr        | 0.2     | MO    |
| 19 | 1399 | 1392 | ( <i>Z</i> )-Jasmone               | 1.0       | 2.1     | MO    |
| 20 | 1406 | *    | Osmorhizol                         | 0.2       | 0.2     | O     |
| 21 | 1416 | 1413 | ( <i>E</i> )- $\beta$ -Damascone   | 0.8       | 0.2     | MO    |
| 22 | 1425 | 1417 | ( <i>E</i> )-Caryophyllene         | tr        | 0.2     | SH    |
| 23 | 1467 | 1464 | 9-epi-( <i>E</i> )-Caryophyllene   | 0.3       | 0.3     | SH    |
| 24 | 1470 | 1469 | <i>n</i> -Dodecanol                | 0.1       | /       | O     |
| 25 | 1478 |      | Unidentified 1                     | /         | 1.5     | U     |
| 26 | 1480 | 1478 | $\gamma$ -Muurolene                | 0.1       | 0.2     | SH    |
| 27 | 1483 |      | Unidentified 2                     | /         | 1.0     | U     |
| 28 | 1487 |      | Unidentified 3                     | 0.2       | 0.8     | U     |
| 29 | 1495 | 1495 | 2-Tridecanone                      | tr        | 0.1     | O     |
| 30 | 1499 | 1493 | epi-Cubebol                        | 0.8       | 1.1     | SO    |
| 31 | 1507 | 1509 | Tridecanal                         | 0.1       | 0.4     | O     |
| 32 | 1520 | 1514 | Cubebol                            | 0.8       | 1.7     | SO    |
| 33 | 1527 | 1522 | $\delta$ -Cadinene                 | 0.2       | 0.6     | SH    |
| 34 | 1536 | *    | Dihydroactinidiolide               | 0.1       | /       | MO    |
| 35 | 1563 | 1561 | ( <i>E</i> )-Nerolidol             | 0.1       | 0.2     | SO    |

|    |      |      |                                               |     |      |    |
|----|------|------|-----------------------------------------------|-----|------|----|
| 36 | 1572 | 1565 | (3Z)-Hexenyl benzoate                         | 0.6 | 0.2  | O  |
| 37 | 1591 | *    | Torilenol                                     | 0.5 | 1.2  | SO |
| 38 | 1612 | *    | Copaborneol                                   | 1.0 | 1.3  | SO |
| 39 | 1624 | 1618 | 1,10-di-epi-Cubenol                           | 0.3 | 1.4  | SO |
| 40 | 1630 | *    | epi- $\alpha$ -Cadinol                        | /   | 0.3  | SO |
| 41 | 1634 | 1627 | 1-epi-Cubenol                                 | 0.5 | 1.0  | SO |
| 42 | 1647 | 1640 | epi- $\alpha$ -Muurolol                       | 1.2 | 2.4  | SO |
| 43 | 1652 | 1644 | $\alpha$ -Muurolol                            | 0.3 | 1.1  | SO |
| 44 | 1661 | 1652 | $\alpha$ -Cadinol                             | 1.4 | 2.9  | SO |
| 45 | 1665 | 1660 | <i>cis</i> -Calamenen-10-ol                   | 0.1 | tr   | SO |
| 46 | 1671 | 1656 | Patchouli alcohol                             | 7.9 | 20.0 | SO |
| 47 | 1677 | 1676 | Mustakone                                     | 0.5 | 0.4  | SO |
| 48 | 1689 | 1685 | Germacra-4(15),5,10(14)-trien-1- $\alpha$ -ol | 0.7 | 0.7  | SO |
| 49 | 1701 |      | Unidentified 4                                | /   | 4.8  | U  |
| 50 | 1715 | 1708 | Thujopsenal                                   | 0.5 | 1.5  | SO |
| 51 | 1726 |      | Unidentified 5                                | 0.1 | 0.9  | U  |
| 52 | 1745 | 1739 | Oplopanone                                    | /   | tr   | SO |
| 53 | 1768 | 1759 | Benzyl benzoate                               | 5.5 | 4.2  | O  |
| 54 | 1773 | 1766 | Drimenol                                      | 2.0 | 2.7  | SO |
| 55 | 1800 | 1800 | Octadecane                                    | 0.1 | /    | O  |
| 56 | 1808 | 1807 | 2-Ethylhexyl salicylate                       | 0.2 | 0.5  | O  |
| 57 | 1812 | *    | Hexadecanal                                   | 0.1 | /    | O  |
| 58 | 1824 | 1828 | Isopropyl myristate                           | 0.3 | 0.5  | O  |
| 59 | 1834 | *    | Neophytadiene                                 | 0.1 | /    | DH |
| 60 | 1841 | *    | Hexahydrofarnesyl acetone                     | 2.6 | 1.1  | SO |
| 61 | 1857 | *    | Galaxolide                                    | 0.1 | 0.2  | SO |
| 62 | 1859 | *    | Phenylethyl benzoate                          | 0.1 | 0.2  | O  |
| 63 | 1873 | 1864 | Benzyl salicylate                             | 0.7 | 0.1  | O  |
| 64 | 1900 | 1900 | Nonadecane                                    | 0.4 | 1.1  | O  |
| 65 | 1904 | *    | 2-Heptadecanone                               | 0.4 | 0.2  | O  |
| 66 | 1916 | 1913 | (5 <i>E</i> ,9 <i>E</i> )-Farnesyl acetone    | 0.2 | /    | SO |
| 67 | 1922 | 1921 | Methyl hexadecanoate                          | 0.2 | 0.2  | O  |
| 68 | 1945 | 1942 | Isophytol                                     | 0.2 | /    | DO |
| 69 | 1988 | 1992 | Ethyl hexadecanoate                           | 0.2 | /    | O  |
| 70 | 2000 | 2000 | Eicosane                                      | 0.4 | 0.6  | O  |
| 71 | 2021 | 2024 | Isopropyl palmitate                           | 0.2 | 0.2  | O  |
| 72 | 2027 | 2026 | ( <i>E,E</i> )-Geranyl linalool               | 0.1 | /    | DO |
| 73 | 2053 | 2042 | Kaurene                                       | 1.0 | 0.8  | DH |
| 74 | 2078 | *    | 1-Octadecanol                                 | 0.1 | /    | O  |
| 75 | 2100 | 2100 | Heneicosane                                   | 5.1 | 11.5 | O  |

|                              |      |      |                                         |             |             |    |
|------------------------------|------|------|-----------------------------------------|-------------|-------------|----|
| 76                           | 2111 | *    | Phytol                                  | 14.1        | 0.6         | DO |
| 77                           | 2163 | *    | Ethyl oleate                            | 0.1         | /           | O  |
| 78                           | 2200 | 2200 | Docosane                                | 0.7         | 0.7         | O  |
| 79                           | 2255 | *    | 2-Methyl-docosane                       | 0.7         | 0.6         | O  |
| 80                           | 2261 | *    | Citroflex A                             | 0.2         | 0.1         | O  |
| 81                           | 2267 | *    | (Z)-9-Tricosene                         | 0.2         | /           | O  |
| 82                           | 2300 | 2300 | Tricosane                               | 7.2         | 8.4         | O  |
| 83                           | 2351 | *    | 4,8,12,16-Tetramethylheptadecan-4-olide | 0.2         | /           | DO |
| 84                           | 2400 | 2400 | Tetracosane                             | 0.8         | 0.6         | O  |
| 85                           | 2454 | *    | 2-Methyltetracosane                     | 0.4         | tr          | O  |
| 86                           | 2466 | *    | 7-Pentacosene                           | 0.4         | tr          | O  |
| 87                           | 2500 | 2500 | Pentacosane                             | 6.2         | 3.1         | O  |
| 88                           | 2576 | *    | Tricosane-6,8-dione                     | 13.4        | 3.1         | O  |
| 89                           | 2600 | 2600 | Hexacosane                              | 0.5         | 0.3         | O  |
| 90                           | 2700 | 2700 | Heptacosane                             | 2.4         | 0.8         | O  |
| 91                           | 2722 | *    | Tetracosanoic acid, methyl ester        | 0.2         | /           | O  |
| 92                           | 2800 | 2800 | Octacosane                              | 0.2         | /           | O  |
| 93                           | 2823 | *    | Squalene                                | 0.7         | /           | TH |
| 94                           | 2900 | 2900 | Nonacosane                              | 2.4         | 0.9         | O  |
| 95                           | 3000 | 3000 | Triacotane                              | 0.1         | /           | O  |
| 96                           | 3100 | 3100 | Hentriacontane                          | 1.9         | /           | O  |
| <b>Total identified</b>      |      |      |                                         | <b>94.7</b> | <b>86.0</b> |    |
| <b>Monoterpenoids (MO)</b>   |      |      |                                         | 2.5         | 2.6         |    |
| <b>Sesquiterpenes (SH)</b>   |      |      |                                         | 0.6         | 1.3         |    |
| <b>Sesquiterpenoids (SO)</b> |      |      |                                         | 21.5        | 41.2        |    |
| <b>Diterpenes (DH)</b>       |      |      |                                         | 1.1         | 0.8         |    |
| <b>Diterpenoids (DO)</b>     |      |      |                                         | 14.6        | 0.6         |    |
| <b>Triterpenes (TH)</b>      |      |      |                                         | 0.7         |             |    |
| <b>Others</b>                |      |      |                                         | 53.7        | 39.5        |    |
| <b>Unidentified (U)</b>      |      |      |                                         | 0.3         | 9.0         |    |

Compounds listed in order of elution on a HP-5 MS column. **RI**: experimentally determined retention indices on the mentioned column by co-injection of a homologous series of *n*-alkanes C<sub>8</sub>-C<sub>32</sub>; **RA**: Adams retention indices; \*: identified by comparison of the mass spectra with those of the commercial libraries Wiley 6, Nist 2.0 and Essentialoils-23b, as well as with those retention indices; **tr**: trace <0.05%; **/**: not detected. Unidentified (EI-MS: 70 eV, 230°, in m/z(rel %)): RI 1478: 59(25), 60(26), 69(46), 70(100), 95(17), 96(59), 97(83), 128(24), 129(57), 189(50); RI 1483: 70(9), 85(9), 96(12), 106(10), 108(13), 140(100), 141(12), 150(17), 154(8), 183(29); RI 1487: 140(100), 123(58), 183(25), 150(17), 108(15), 177(12), 106(12), 141(11), 107(10), 85(9); RI 1701: 70(10), 80(7), 96(100), 97(7), 108(21), 121(33), 140(38), 150(7), 183(11), 210(13); RI 1726: 70(9), 80(8), 96(100), 97(9), 108(22), 121(34), 140(35), 150(6), 183(10), 210(13).

## **References**

Adams RP. 2007. Identification of essential oil components by gas chromatography/mass spectrometry. 4th ed. Illinois USA: Allured Publishing Corporation, Carol Stream.

British pharmacopoeia. 1988. British pharmacopoeia. London: HMSO, 2, 137-138.
